# Supplementary material
Source: Royal Society of Chemistry journal article supplement (doi:10.1039/d5cp04900h)
Supplement: d5cp04900h1.pdf [file d5cp04900h1.pdf]

Supplementary Information for

**Calix[4]arenes in Mixed Protic Media: Conformational  
Characteristics and Solvent Effects Captured with Molecular  
Simulations**

Rakiba Rohman,<sup>\*a</sup> and Neelanjana Sengupta<sup>\*a</sup>

<sup>a</sup> Department of Biological Sciences, Indian Institute of Science Education and Research  
Kolkata, Mohanpur, West Bengal 741246, India

Email: [n.sengupta@iiserkol.ac.in](mailto:n.sengupta@iiserkol.ac.in) and [raqiba.rohman444@gmail.com](mailto:raqiba.rohman444@gmail.com)

## Contents

### Figures

- S1 (a) Root Mean Square Deviation (RMSD) of calixtyrosol (CT, upper panel) and aza-calixtyrosol (ACT, lower panel) as a function of simulation time ( $t$ ), for a range of effective dielectric constants ( $\epsilon_{eff}$ ). Each subplot corresponds to a different dielectric condition, with grey traces representing instantaneous RMSD values and colored lines denoting running averages. (b) and (c) represent snapshots of the structures corresponding to the distinct distributions of the RMSD plots. The structures numbered with the *magenta* color code correspond to the starting structure at the beginning of the unconstrained production run, whereas those numbered with the *green* and *yellow* are obtained at the end of 1000ns of production run. 5
- S2 Time evolution of key dihedral angles  $\alpha$  and  $\beta$  in calix[4]tyrosol (CT, top two rows) and aza-calix[4]tyrosol (ACT, bottom two rows) across a range of  $\epsilon_{eff}$ , representing different solvent environments. In each panel, grey lines show the raw angle values sampled throughout 1 microsecond molecular dynamics simulations, while the colored traces depict the corresponding running averages. The plots illustrate the dynamic behavior and stability of the characteristic conformational angles under various solvent polarities. 6
- S3 Representation of radial distribution functions (RDFs),  $g(r)$ , ( $r$  is in Å) for the oxygen atoms of water [H<sub>2</sub>O(O)], oxygen atoms of methanol [MeOH(O)], and carbon atoms of methanol [MeOH(C)], respectively, measured relative to all atoms of CT (upper row) and ACT (lower row) calixaromatics under various  $\epsilon_{eff}$ . 7
- S4 Preferential interaction parameter,  $P(r)$ , ( $r$  is in Å) for water [ $P_W$ , solid line] and methanol [ $P_M$ , dashed line] oxygen atoms with respect to CT (top row) and ACT (bottom row) as a function of distance  $r$  from the macrocycle, calculated under varying  $\epsilon_{eff}$  8
- S5 Variation of interaction energies ( $\Delta E_{int}$ , kcal/mol) and interaction energy per solvent molecule ( $\Delta E_{int}/n_{solvent}$ , kcal/mol) between CT or ACT and solvation shell solvent molecules as a function of  $\epsilon_{eff}$ . [(a) and (c)] represent total interaction energy of water and methanol in the solvation shells with CT (a) and ACT (c). [(b) and (d)] is the corresponding interaction energies normalized per solvent molecule 9

- S6 The normalized velocity autocorrelation functions (VACF) of oxygen atoms,  $C_v^O(t)_{\text{H}_2\text{O}}$ , of H<sub>2</sub>O and MeOH as a function of time  $t$  (in ps) 10
- S7 Vibrational density of states (VDoS),  $I(\omega)$  (a.u.), as a function of frequency  $\omega$  (cm<sup>-1</sup>), obtained from the Fourier transformation of the VACF. (a) represents VDoS plots of hydration layer water (oxygen atom), (b) and (c) represent the same for solvation layer methanol (oxygen and carbon atoms, respectively). The red line represents the respective bulk systems 11
- S8 Representation of RDFs ( $r$  is in Å) for heavy atoms of water and methanol relative to distinct structural regions of CT. For each  $\varepsilon_{eff}$ , water and methanol atoms (top row: O<sub>H<sub>2</sub>O</sub>-CT, middle row: O<sub>MeOH</sub>-CT, bottom row: C<sub>MeOH</sub>-CT) are analyzed around three distinct parts of the calix[4]aromatic structure: whole calixaromatic (CT), upper rim (CT<sub>U</sub>), lower rim (CT<sub>L</sub>), and aromatic ring (CT<sub>Aro</sub>) 12
- S9 Representation of RDFs ( $r$  is in Å) for heavy atoms of water and methanol relative to distinct structural regions of ACT. For each  $\varepsilon_{eff}$ , water and methanol atoms (top row: O<sub>H<sub>2</sub>O</sub>-ACT, middle row: O<sub>MeOH</sub>-ACT, bottom row: C<sub>MeOH</sub>-ACT) are analyzed around three distinct parts of the calix[4]aromatic structure: whole calixaromatic (ACT), upper rim (ACT<sub>U</sub>), lower rim (ACT<sub>L</sub>), and aromatic ring (ACT<sub>Aro</sub>) 13
- S10 Representation of site-resolved pair entropy parameter,  $f(r)$ , ( $r$  is in Å) for water and methanol atoms relative to distinct structural regions of ACT. For each  $\varepsilon_{eff}$ , water and methanol atoms (top row: O<sub>H<sub>2</sub>O</sub>-ACT, middle row: O<sub>MeOH</sub>-ACT, bottom row: C<sub>MeOH</sub>-ACT) are analyzed around three distinct parts of the calix[4]aromatic structure: whole calixaromatic (ACT), upper rim (ACT<sub>U</sub>), lower rim (ACT<sub>L</sub>), and aromatic ring (ACT<sub>Aro</sub>) 14
- S11 Vibrational density of states (VDoS),  $I(\omega)$  (a.u.), for solvation shell methanol oxygen atoms resolved by the local region around CT (top row) and ACT (bottom row). For each  $\varepsilon_{eff}$ , spectra are compared for methanol O atoms in proximity to the whole macrocycle, upper rim, lower rim, and aromatic ring regions. 15
- S12 Representation of radial distribution functions (RDFs),  $g(r)$  [(a), (b), (c)], and time-averaged pair entropy parameter,  $f(r)$  [(d), (e), (f)], ( $r$  is in Å) for the oxygen atoms of water [H<sub>2</sub>O(O)], oxygen atoms of methanol [MeOH(O)], and carbon atoms of methanol [MeOH(C)], respectively, measured relative to all atoms of CT under various  $\varepsilon_{eff}$ , obtained from repeated simulation trajectory. 16

## Tables

|    |                                                                                                                                                                                                                                                                                                                                                                                                                             |    |
|----|-----------------------------------------------------------------------------------------------------------------------------------------------------------------------------------------------------------------------------------------------------------------------------------------------------------------------------------------------------------------------------------------------------------------------------|----|
| S1 | The percentage composition of methanol and the effective dielectric constant of the solvent media ( $\epsilon_{eff}$ ) in various solvent mixtures                                                                                                                                                                                                                                                                          | 17 |
| S2 | Mean peak positions (in $\text{cm}^{-1}$ ) of the VDoS bands for water                                                                                                                                                                                                                                                                                                                                                      | 18 |
| S3 | Site resolved pair entropy ( $S_{(2)}$ ) contribution in $\text{kcal mol}^{-1} \text{K}^{-1}$ to the excess entropy ( $S_{(ex)}$ ) of heavy atoms of water and methanol around the distinct structural regions of CT, in various effective dielectric media ( $\epsilon_{eff}$ )                                                                                                                                            | 19 |
| S4 | Site resolved diffusion coefficients of water and methanol from VACF analysis in CT and ACT systems under various $\epsilon_{eff}$                                                                                                                                                                                                                                                                                          | 21 |
| S5 | Pair entropy ( $S_{(2)}$ ) contribution in $\text{kcal mol}^{-1} \text{K}^{-1}$ to the excess entropy ( $S_{(ex)}$ ) of oxygen atoms of water and methanol ( $\text{H}_2\text{O}(\text{O})$ and $\text{MeOH}(\text{O})$ ) and the carbon atom of methanol ( $\text{MeOH}(\text{C})$ ) around calix[4]tyrosol (CT) in various effective dielectric media ( $\epsilon_{eff}$ ), obtained from repeated simulation trajectory. | 22 |
| S6 | Diffusion coefficients (in $10^{-5} \text{cm}^2/\text{s}$ ) of water and methanol from VACF analysis in CT under various $\epsilon_{eff}$ , obtained from two independent trajectories with standard deviation                                                                                                                                                                                                              | 23 |

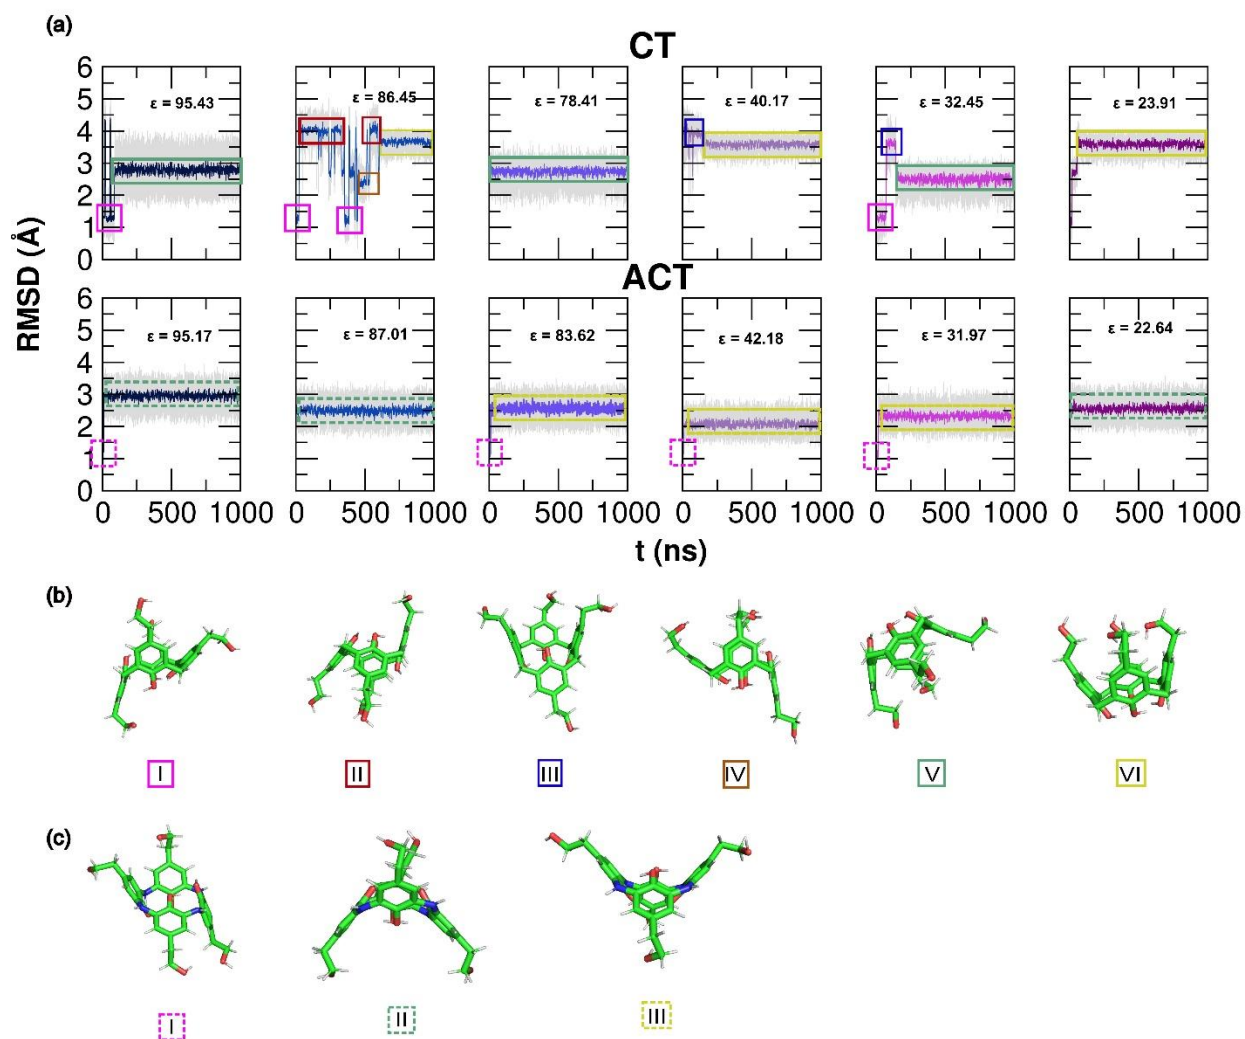

**Fig. S1** (a) Root Mean Square Deviation (RMSD, in Å) of calixtyrosol (CT, upper panel) and aza-calixtyrosol (ACT, lower panel) as a function of simulation time ( $t$ ), for a range of effective dielectric constants ( $\epsilon_{eff}$ ). Each subplot corresponds to a different dielectric condition, with grey traces representing instantaneous RMSD values and colored lines denoting running averages. (b) and (c) represent snapshots of the structures corresponding to the distinct distributions of the RMSD plots. The structures numbered with the *magenta* color code correspond to the starting structure at the beginning of the unconstrained production run, whereas those numbered with the *green* and *yellow* are obtained at the end of 1000ns of production run.

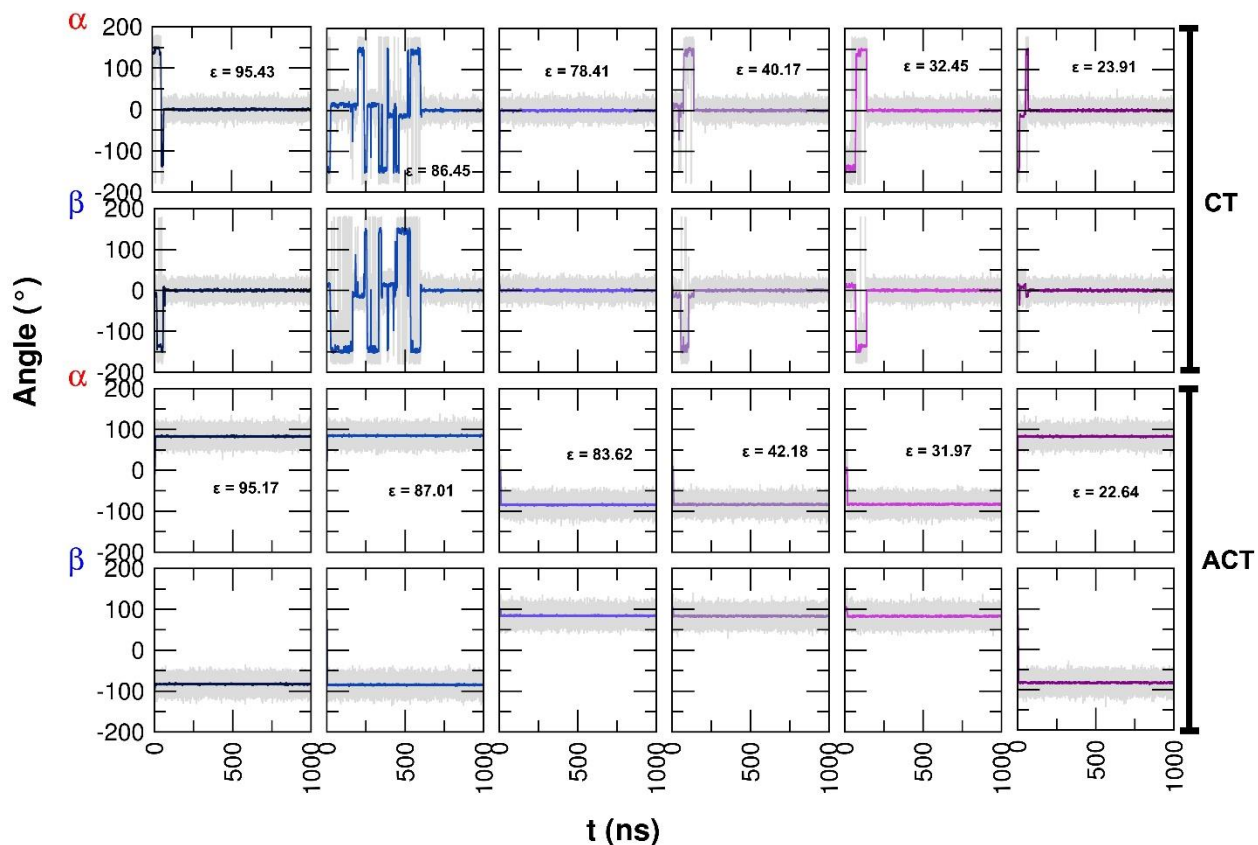

**Fig. S2** Time evolution of key dihedral angles  $\alpha$  and  $\beta$  in calix[4]tyrosol (CT, top two rows) and aza-calix[4]tyrosol (ACT, bottom two rows) across a range of  $\epsilon_{eff}$ , representing different solvent environments. In each panel, grey lines show the raw angle values sampled throughout 1 microsecond molecular dynamics simulations, while the colored traces depict the corresponding running averages. The plots illustrate the dynamic behavior and stability of the characteristic conformational angles under various solvent polarities.

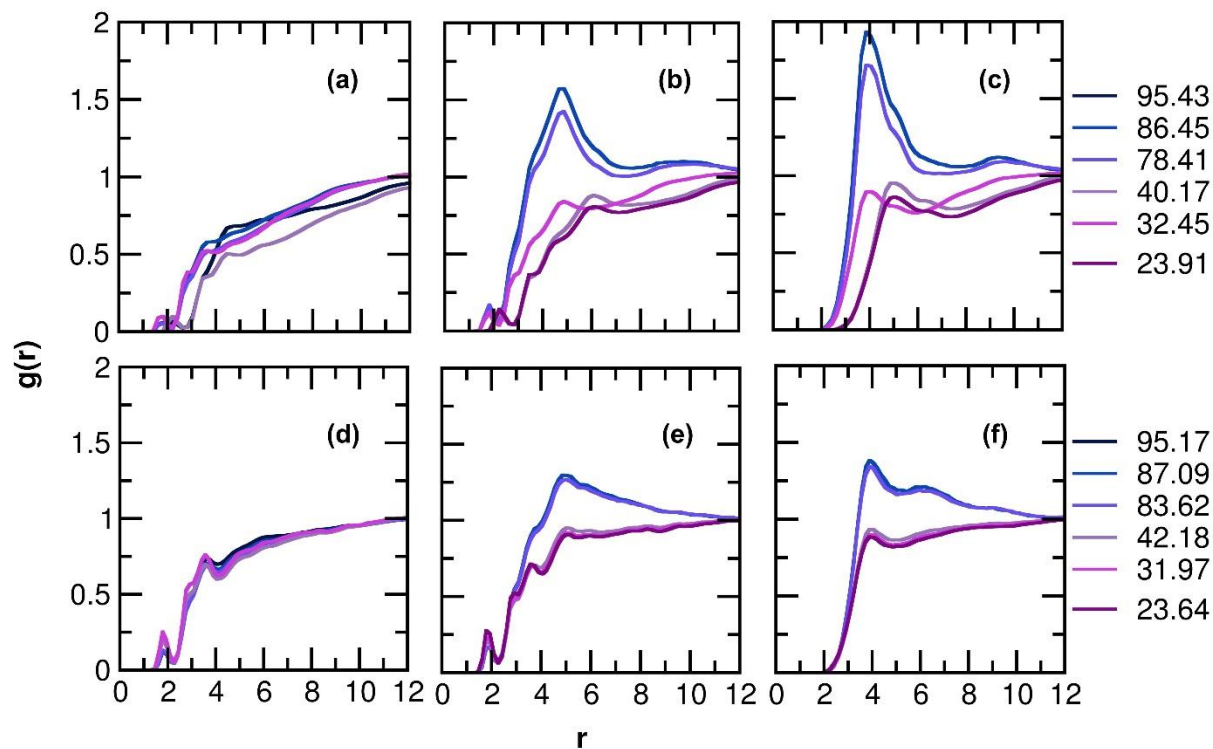

**Fig. S3** Representation of radial distribution functions (RDFs),  $g(r)$ , ( $r$  is in Å) for the oxygen atoms of water [H<sub>2</sub>O(O)], oxygen atoms of methanol [MeOH(O)], and carbon atoms of methanol [MeOH(C)], respectively, measured relative to all atoms of CT (upper row) and ACT (lower row) calixaromatics under various  $\epsilon_{eff}$ .

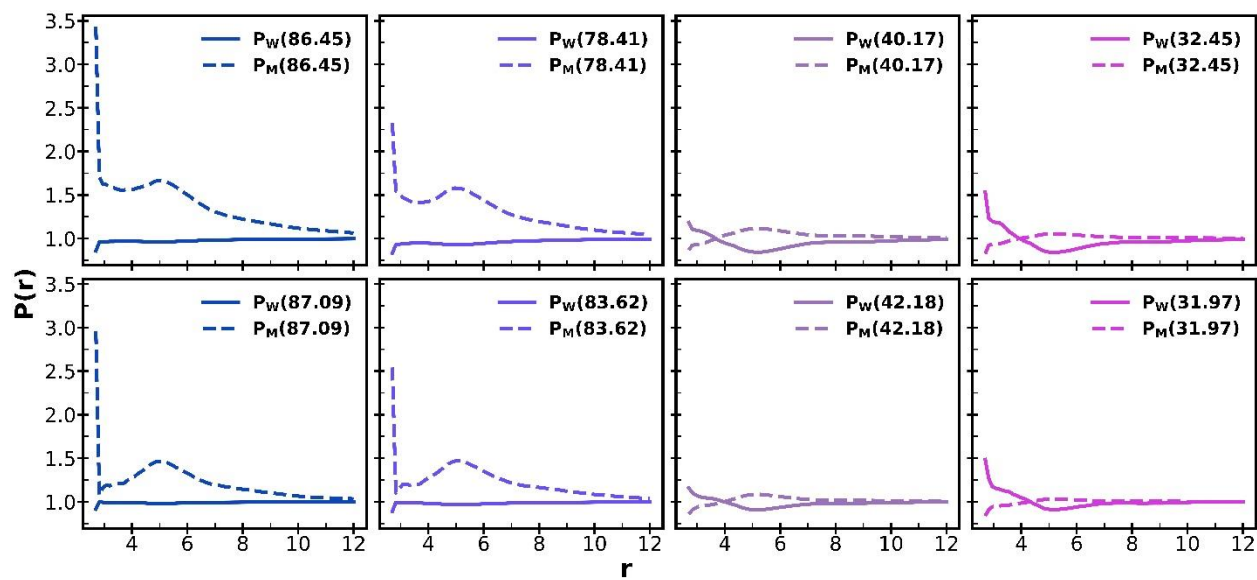

**Fig. S4** Preferential interaction parameter,  $P(r)$ , ( $r$  is in Å) for water [ $P_W$ , solid line] and methanol [ $P_M$ , dashed line] oxygen atoms with respect to CT (top row) and ACT (bottom row) as a function of distance  $r$  from the macrocycle, calculated under varying  $\epsilon_{eff}$ .

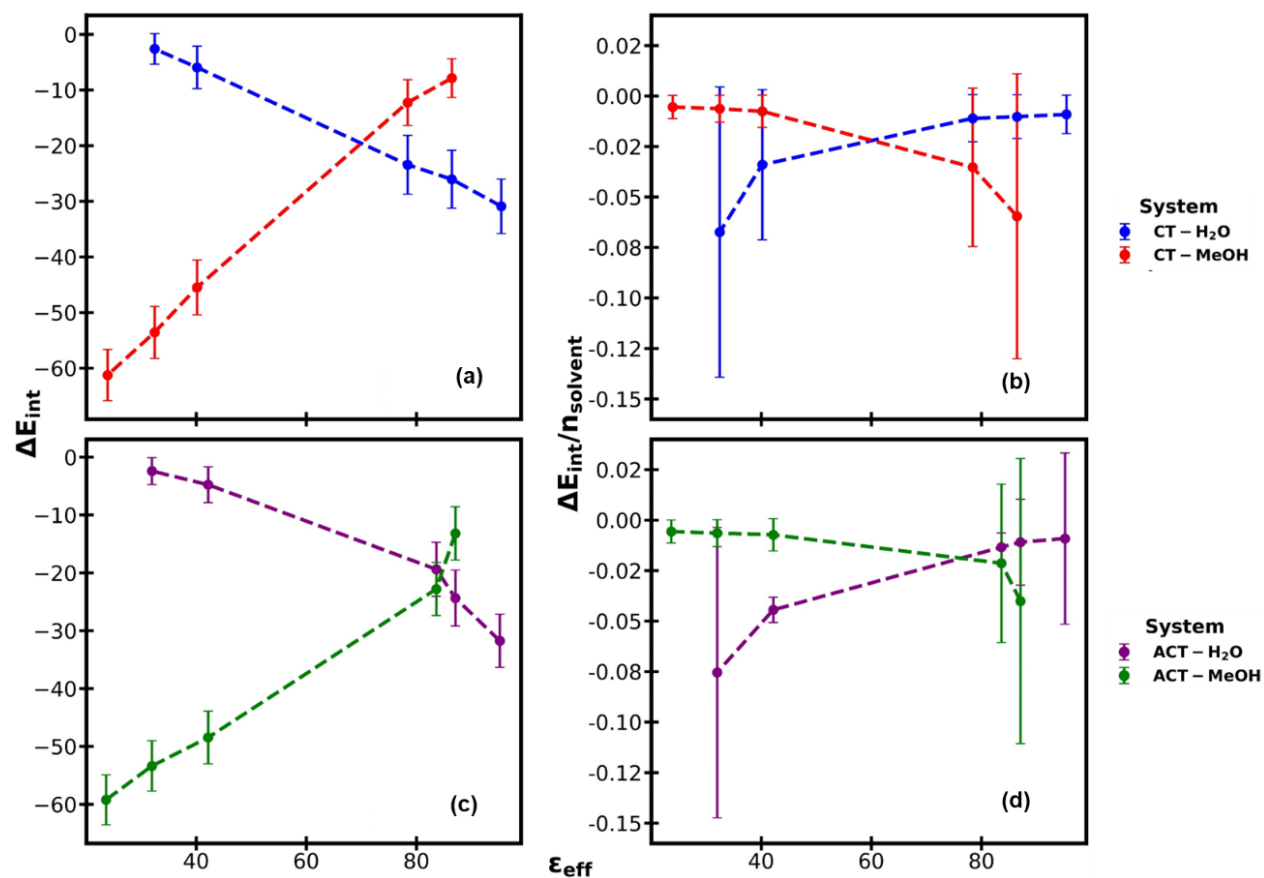

**Fig. S5** Variation of interaction energies ( $\Delta E_{\text{int}}$ , kcal/mol) and interaction energy per solvent molecule ( $\Delta E_{\text{int}}/n_{\text{solvent}}$ , kcal/mol) between CT or ACT and solvation shell solvent molecules as a function of  $\epsilon_{\text{eff}}$ . [(a) and (c)] represent the total interaction energy of water and methanol in the solvation shells with CT (a) and ACT (c). [(b) and (d)] is the corresponding interaction energies normalized per solvent molecule.

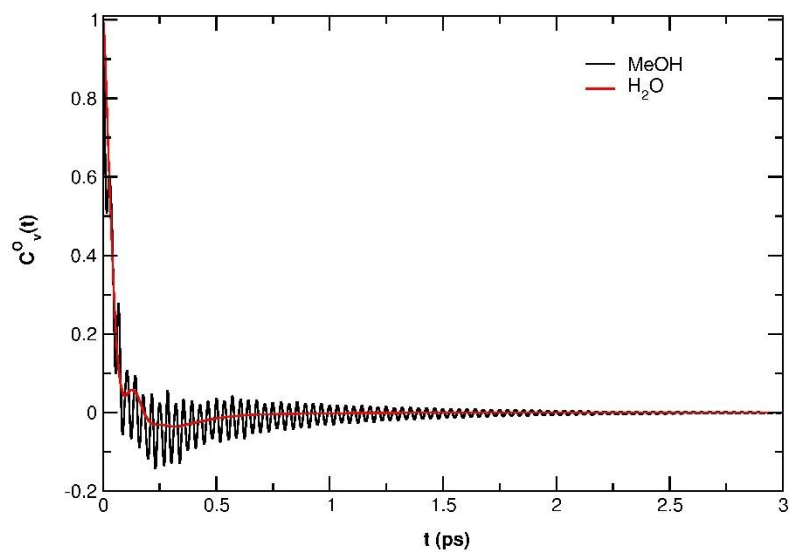

**Fig. S6** The normalized velocity autocorrelation functions (VACF) of oxygen atoms,  $C_v^O(t)_{\text{H}_2\text{O}}$ , of H<sub>2</sub>O and MeOH as a function of time  $t$  (in ps)

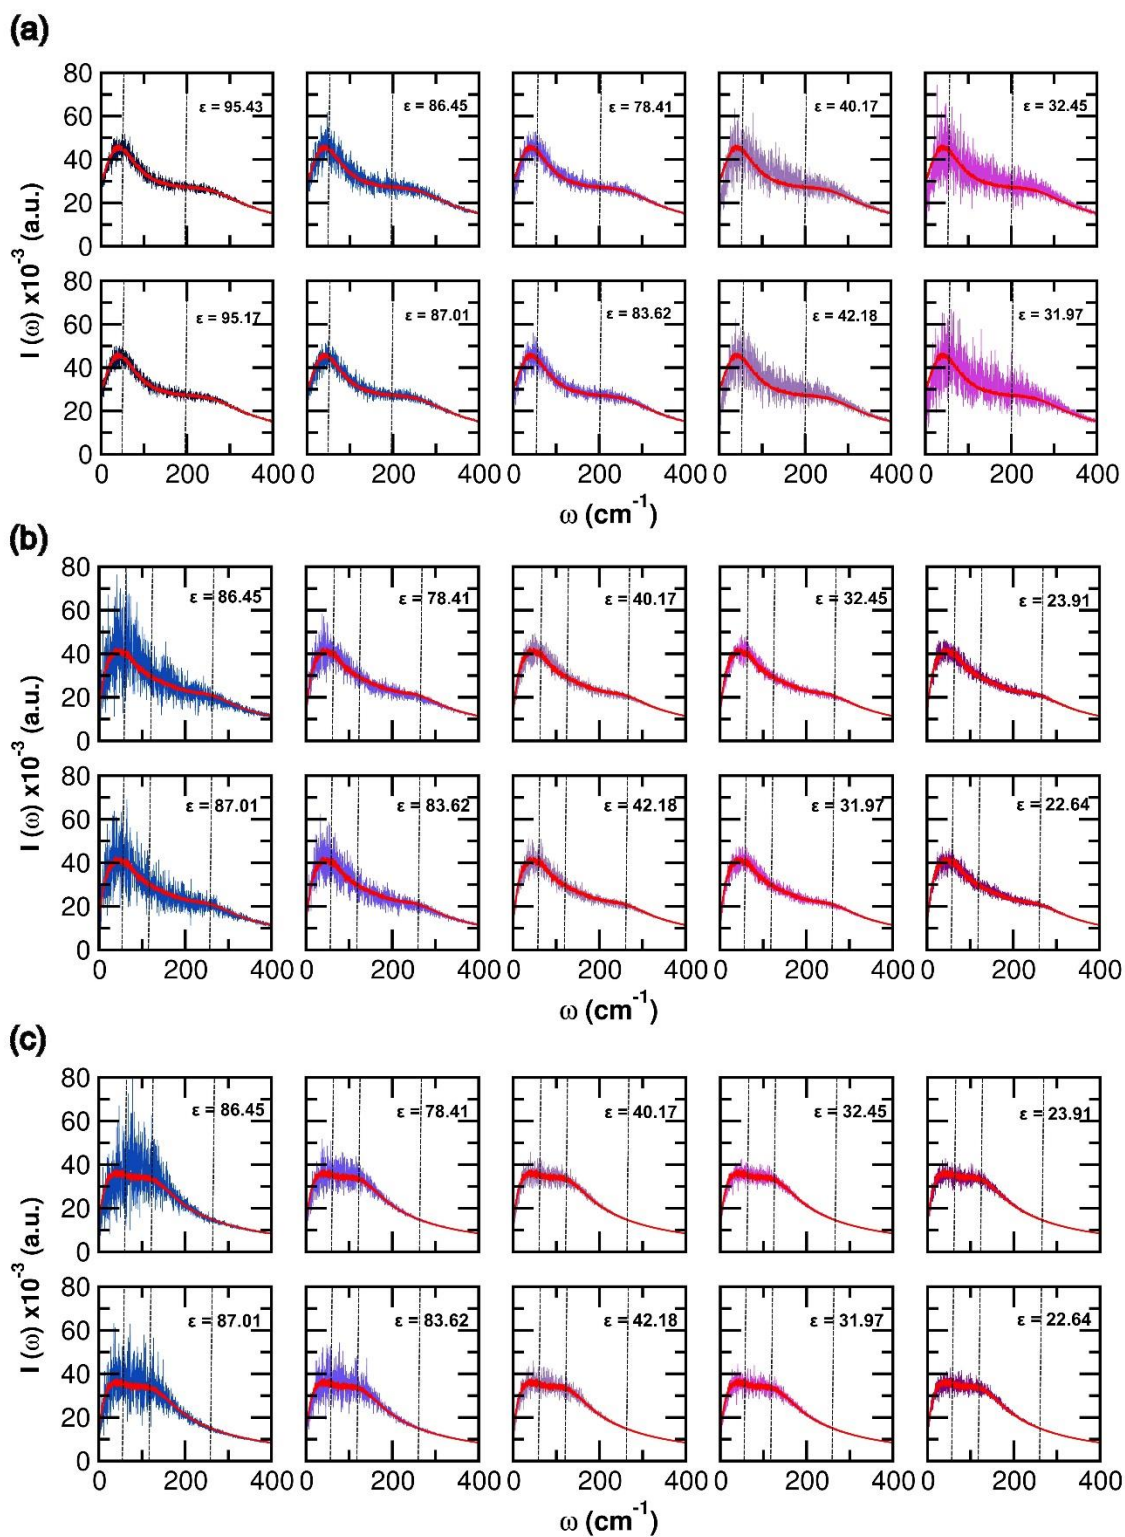

**Fig. S7** Vibrational density of states (VDoS),  $I(\omega)$  (a.u.), as a function of frequency  $\omega$  ( $\text{cm}^{-1}$ ), obtained from the Fourier transformation of the VACF. (a) represents VDoS plots of hydration

layer water (oxygen atom), (b) and (c) represent the same for solvation layer methanol (oxygen and carbon atoms, respectively). The red line represents the respective bulk systems.

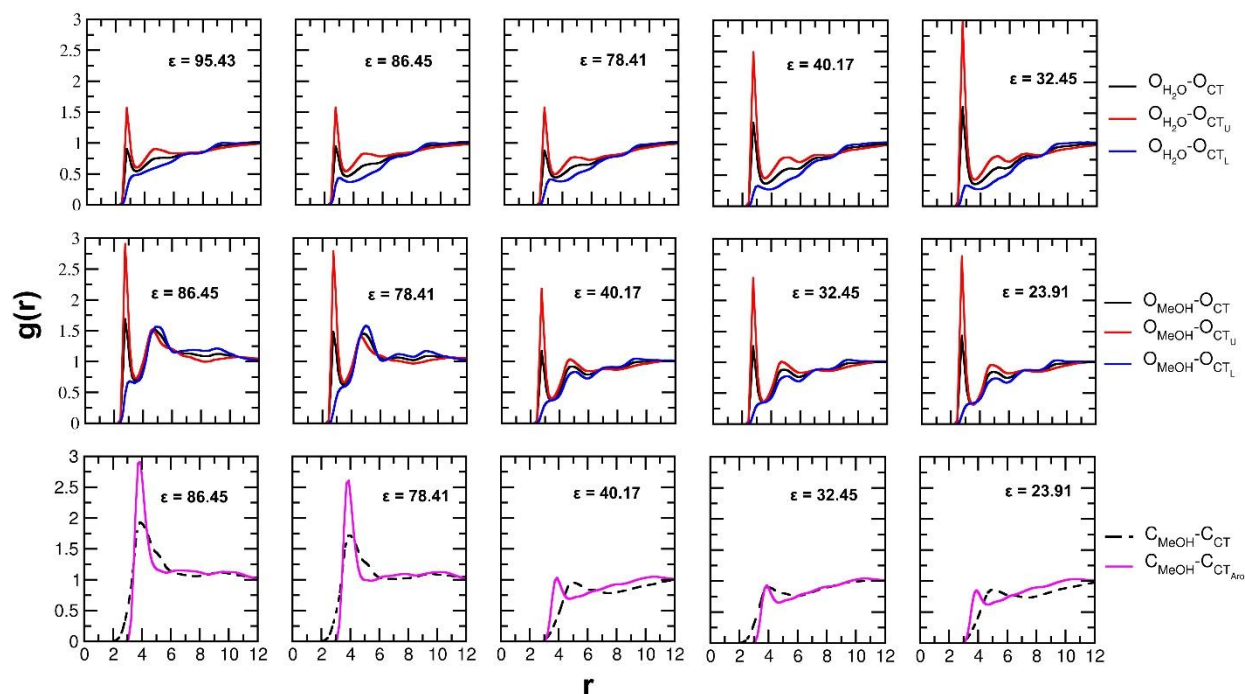

**Fig. S8** Representation of RDFs ( $r$  is in Å) for heavy atoms of water and methanol relative to distinct structural regions of CT. For each  $\epsilon_{eff}$ , water and methanol atoms (top row:  $O_{H_2O}-CT$ , middle row:  $O_{MeOH}-CT$ , bottom row:  $C_{MeOH}-CT$ ) are analyzed around three distinct parts of the calix[4]aromatic structure: whole calixaromatic (CT), upper rim ( $CT_U$ ), lower rim ( $CT_L$ ), and aromatic ring ( $CT_{Aro}$ )

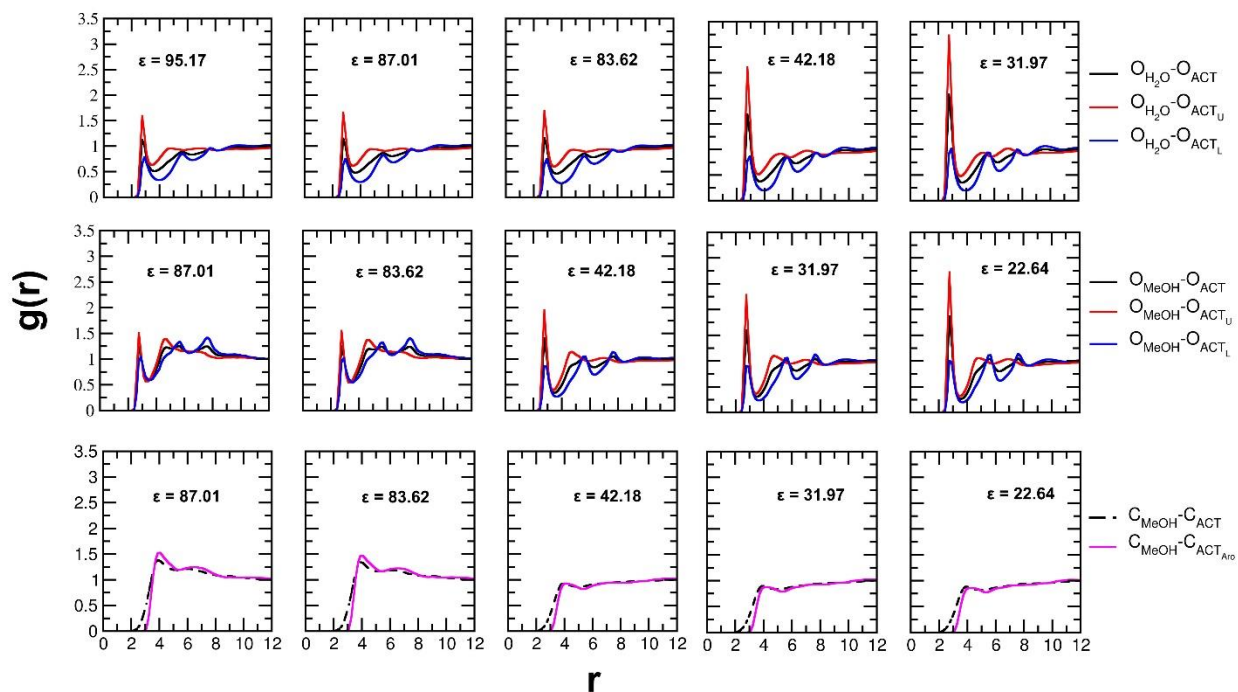

**Fig. S9** Representation of RDFs ( $r$  is in Å) for heavy atoms of water and methanol relative to distinct structural regions of ACT. For each  $\epsilon_{eff}$ , water and methanol atoms (top row:  $O_{H_2O}-ACT$ , middle row:  $O_{MeOH}-ACT$ , bottom row:  $C_{MeOH}-ACT$ ) are analyzed around three distinct parts of the calix[4]aromatic structure: whole calixaromatic (ACT), upper rim ( $ACT_U$ ), lower rim ( $ACT_L$ ), and aromatic ring ( $ACT_{Aro}$ )

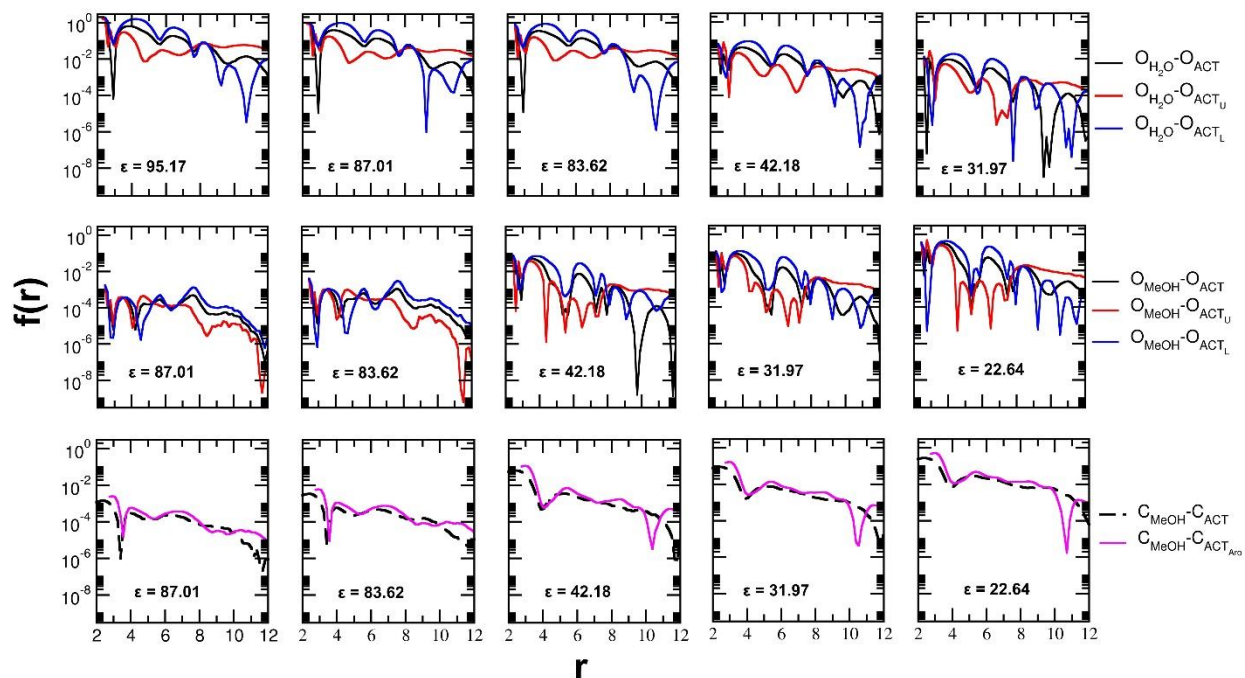

**Fig. S10** Representation of site-resolved pair entropy parameter,  $f(r)$ , ( $r$  is in Å) for water and methanol atoms relative to distinct structural regions of ACT. For each  $\epsilon_{eff}$ , water and methanol atoms (top row:  $O_{H_2O}-ACT$ , middle row:  $O_{MeOH}-ACT$ , bottom row:  $C_{MeOH}-ACT$ ) are analyzed around three distinct parts of the calix[4]aromatic structure: whole calixaromatic (ACT), upper rim ( $ACT_U$ ), lower rim ( $ACT_L$ ), and aromatic ring ( $ACT_{Aro}$ )

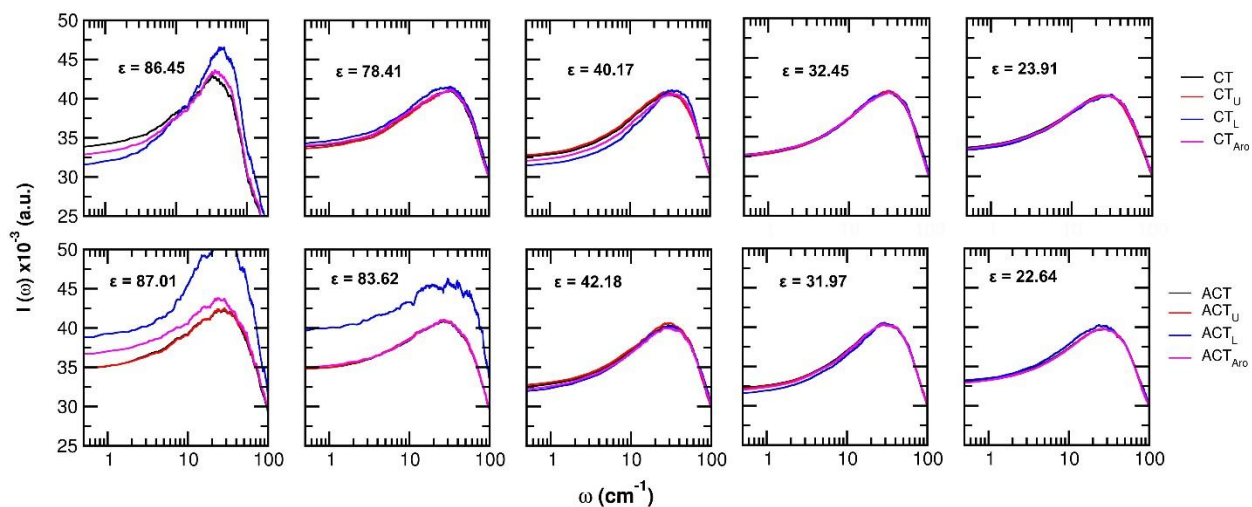

**Fig. S11** Vibrational density of states (VDoS),  $I(\omega)$  (a.u.), for solvation shell methanol oxygen atoms resolved by the local region around CT (top row) and ACT (bottom row). For each  $\epsilon_{eff}$ , spectra are compared for methanol O atoms in proximity to the whole macrocycle, upper rim, lower rim, and aromatic ring regions. The x-axis is plotted on a logarithmic scale to emphasize low-frequency vibrational modes.

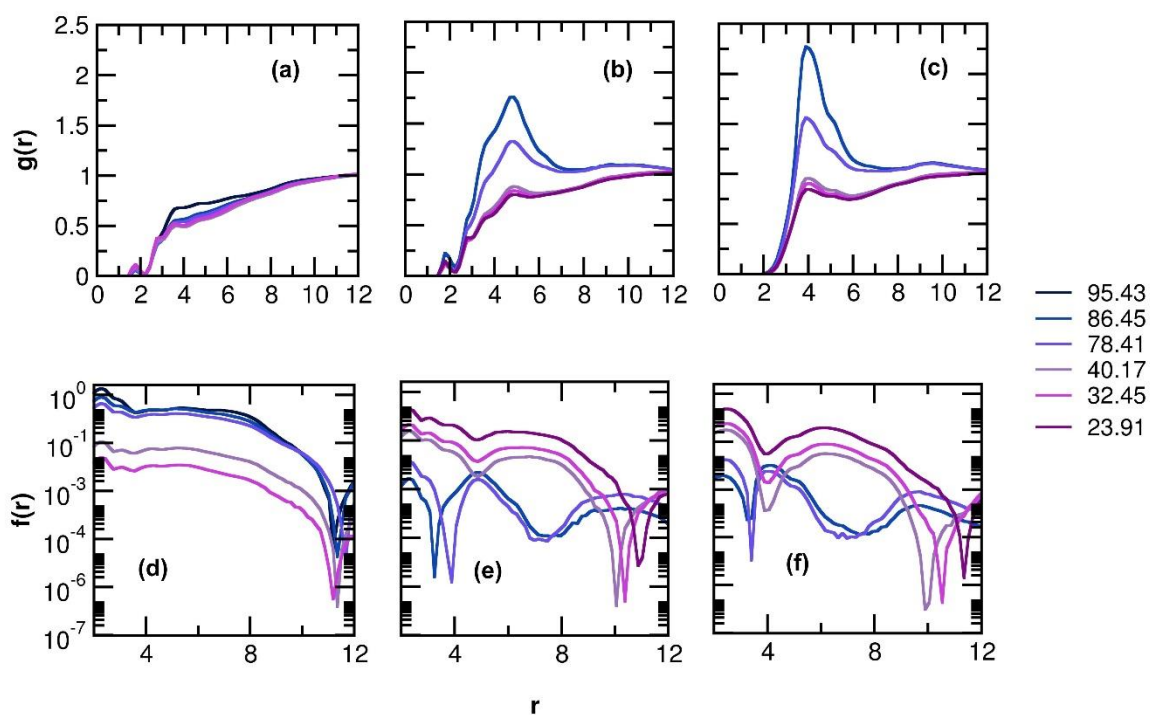

**Fig. S12** Representation of radial distribution functions (RDFs),  $g(r)$  [(a), (b), (c)], and time-averaged pair entropy parameter,  $f(r)$  [(d), (e), (f)], ( $r$  is in Å) for the oxygen atoms of water [ $\text{H}_2\text{O}(\text{O})$ ], oxygen atoms of methanol [ $\text{MeOH}(\text{O})$ ], and carbon atoms of methanol [ $\text{MeOH}(\text{C})$ ], respectively, measured relative to all atoms of CT under various  $\epsilon_{eff}$ , obtained from repeated simulation trajectory.

**Table S1** The percentage composition of methanol and the effective dielectric constant of the solvent media ( $\epsilon_{eff}$ ) in various solvent mixtures

| MeOH (%n/n) | $\epsilon_{eff}$ |       |
|-------------|------------------|-------|
|             | CT               | ACT   |
| 0           | 95.43            | 95.17 |
| 5           | 86.45            | 87.09 |
| 10          | 78.41            | 83.62 |
| 55          | 40.17            | 42.18 |
| 75          | 32.45            | 31.97 |
| 100         | 23.91            | 23.64 |

**Table S2** Mean peak positions (in  $\text{cm}^{-1}$ ) of the VDoS bands for water

| CT               |            |            |
|------------------|------------|------------|
| $\epsilon_{eff}$ | $\omega_1$ | $\omega_2$ |
| 95.43            | 54.23      | 200.02     |
| 86.45            | 54.22      | 200.14     |
| 78.41            | 55.12      | 200.60     |
| 40.17            | 55.17      | 199.61     |
| 32.45            | 54.79      | 198.72     |
| 23.91            | ---        | ---        |
| ACT              |            |            |
| 95.17            | 55.88      | 199.06     |
| 87.09            | 54.55      | 198.42     |
| 83.62            | 54.33      | 199.28     |
| 42.18            | 54.55      | 199.61     |
| 31.97            | 54.88      | 200.76     |
| 23.64            | ---        | ---        |
| Bulk             | 53.53      | 199.48     |
| Experimental     | ~50        | ~200       |

**Table S3** Site resolved pair entropy ( $S_{(2)}$ ) contribution in kcal mol<sup>-1</sup> K<sup>-1</sup> to the excess entropy ( $S_{(ex)}$ ) of heavy atoms of water and methanol around the distinct structural regions of CT, in various effective dielectric media ( $\epsilon_{eff}$ )

| $\epsilon_{eff}$ | $S_{(2)}$                |                            |                            |                          |                            |                            |                                |
|------------------|--------------------------|----------------------------|----------------------------|--------------------------|----------------------------|----------------------------|--------------------------------|
|                  | Water                    |                            |                            | Methanol                 |                            |                            |                                |
|                  | CT                       |                            |                            |                          |                            |                            |                                |
|                  | $O_{H_2O}$<br>- $O_{CX}$ | $O_{H_2O}$<br>- $O_{CX_U}$ | $O_{H_2O}$<br>- $O_{CX_L}$ | $O_{MeOH}$<br>- $O_{CX}$ | $O_{MeOH}$<br>- $O_{CX_U}$ | $O_{MeOH}$<br>- $O_{CX_L}$ | $C_{MeOH}$<br>- $C_{CX_{Aro}}$ |
| 95.43            | -2.11<br>(±0.28)         | -1.45<br>(±0.24)           | -3.74<br>(±0.43)           | ---                      | ---                        | ---                        | ---                            |
| 86.45            | -1.94<br>(±0.21)         | - 1.27<br>(±0.17)          | -3.31<br>(±0.33)           | -0.004<br>(±0.001)       | -0.004<br>(±0.001)         | -0.006<br>(±0.001)         | -0.01<br>(±0.00)               |
| 78.41            | -1.38<br>(±0.13)         | -0.94<br>(±0.09)           | -2.21<br>(±0.21)           | -0.008<br>(±0.002)       | -0.008<br>(±0.003)         | -0.02<br>(±0.00)           | -0.03<br>(±0.00)               |
| 40.17            | -0.11<br>(±0.01)         | -0.07<br>(±0.01)           | -0.20<br>(±0.02)           | -0.08<br>(±0.02)         | -0.08<br>(±0.01)           | -0.14<br>(±0.02)           | -0.12<br>(±0.03)               |
| 32.45            | -0.03<br>(±0.00)         | -0.03<br>(±0.00)           | -0.06<br>(±0.01)           | -0.15<br>(±0.03)         | -0.14<br>(±0.03)           | -0.25<br>(±0.04)           | -0.22<br>(±0.05)               |
| 23.91            | ---                      | ---                        | ---                        | -0.51<br>(±0.08)         | -0.54<br>(±0.09)           | -0.81<br>(±0.11)           | -0.73<br>(±0.14)               |
|                  | ACT                      |                            |                            |                          |                            |                            |                                |
| 95.17            | -1.79<br>(±0.32)         | -1.06<br>(±0.28)           | -3.52<br>(±0.51)           | ---                      | ---                        | ---                        | ---                            |
| 87.09            | -1.09<br>(±0.18)         | -0.06<br>(±0.15)           | -2.21<br>(±0.30)           | -0.001<br>(±0.000)       | -0.001<br>(±0.000)         | -0.002<br>(±0.000)         | -0.002<br>(±0.000)             |
| 83.62            | -0.86<br>(±0.13)         | -0.39<br>(±0.09)           | -2.04<br>(±0.27)           | -0.003<br>(±0.000)       | -0.002<br>(±0.000)         | -0.005<br>(±0.001)         | -0.006<br>(±0.001)             |
| 42.18            | -0.09<br>(±0.01)         | -0.05<br>(±0.01)           | -0.21<br>(±0.03)           | -0.06<br>(±0.02)         | -0.04<br>(±0.01)           | -0.13<br>(±0.02)           | -0.082<br>(±0.026)             |
| 31.97            | -0.02<br>(±0.00)         | -0.01<br>(±0.00)           | -0.04<br>(±0.01)           | -0.11<br>(±0.02)         | -0.08<br>(±0.02)           | -0.23<br>(±0.02)           | -0.134<br>(±0.038)             |

|       |     |     |     |                  |                  |                   |                    |
|-------|-----|-----|-----|------------------|------------------|-------------------|--------------------|
| 23.64 | --- | --- | --- | -0.42<br>(±0.08) | -0.35<br>(±0.09) | --0.80<br>(±0.13) | -0.441<br>(±0.118) |
|-------|-----|-----|-----|------------------|------------------|-------------------|--------------------|

**Table S4** Site resolved diffusion coefficients (in  $10^{-5}$  cm<sup>2</sup>/s) of water and methanol from VACF analysis in CT and ACT systems under various  $\varepsilon_{eff}$

| $\varepsilon_{eff}$ | $D^0_{H_2O}$ |       |          | $D^0_{MeOH}$ |       |          |
|---------------------|--------------|-------|----------|--------------|-------|----------|
|                     | Upper        | Lower | Aromatic | Upper        | Lower | Aromatic |
|                     | CT           |       |          |              |       |          |
| 95.43               | 3.89         | 3.04  | 4.20     | ---          | ---   | ---      |
| 86.45               | 3.98         | 4.13  | 3.62     | 0.71         | ---   | 0.71     |
| 78.41               | 2.24         | 2.41  | 3.17     | 1.89         | 3.03  | 2.48     |
| 40.17               | 1.90         | 2.35  | 2.48     | 1.41         | 1.99  | 1.81     |
| 32.45               | 1.74         | --    | 2.11     | 1.48         | 1.43  | 1.28     |
| 23.91               | ---          | ---   | ---      | 2.03         | 1.48  | 1.73     |
|                     | ACT          |       |          |              |       |          |
| 95.17               | 4.09         | 4.06  | 3.46     | ---          | ---   | ---      |
| 87.09               | 3.61         | 4.44  | 3.89     | 0.66         | ---   | 1.49     |
| 83.62               | 2.34         | 2.72  | 3.18     | 2.23         | ---   | 1.94     |
| 42.18               | 2.60         | 3.49  | 2.18     | 2.09         | 2.09  | 1.87     |
| 31.97               | 1.69         | 0.32  | 1.95     | 1.80         | 1.54  | 1.60     |
| 23.64               | ---          | ---   | ---      | 1.59         | 1.38  | 1.53     |

**Table S5:** Pair entropy ( $S_{(2)}$ ) contribution in kcal mol<sup>-1</sup> K<sup>-1</sup> to the excess entropy ( $S_{(ex)}$ ) of oxygen atoms of water and methanol (H<sub>2</sub>O(O) and MeOH(O)) and the carbon atom of methanol (MeOH(C)) around calix[4]tyrosol (CT) in various effective dielectric media ( $\epsilon_{eff}$ ), obtained from the additional independent simulation trajectories.

| $\epsilon_{eff}$ | $S_{(2)}$           |               |               |       |
|------------------|---------------------|---------------|---------------|-------|
|                  | H <sub>2</sub> O(O) | MeOH(O)       | MeOH(C)       | Total |
| 95.43            | -3.56 (±0.36)       | ---           | ---           | -3.56 |
| 86.45            | -2.59 (±0.21)       | -0.01 (±0.00) | -0.01 (±0.00) | -2.61 |
| 78.41            | -1.79 (±0.13)       | -0.01 (±0.00) | -0.02 (±0.00) | -1.82 |
| 40.17            | -0.14 (±0.01)       | -0.13 (±0.01) | -0.12 (±0.02) | -0.39 |
| 32.45            | -0.04 (±0.00)       | -0.22 (±0.02) | -0.21 (±0.03) | -0.47 |
| 23.91            | ---                 | -0.65 (±0.07) | -0.64 (±0.09) | -1.29 |

**Table S6** Diffusion coefficients (in  $10^{-5}$  cm<sup>2</sup>/s) of water and methanol from VACF analysis in CT under various  $\varepsilon_{eff}$ , obtained from two independent trajectories with standard deviation

| $\varepsilon_{eff}$ | $D^o_{H_2O}$     | $D^o_{MeOH}$     | $D^c_{MeOH}$     |
|---------------------|------------------|------------------|------------------|
| 95.43               | $4.06 \pm 0.005$ | ---              | ---              |
| 86.45               | $4.02 \pm 0.048$ | $0.94 \pm 0.014$ | $0.77 \pm 0.013$ |
| 78.41               | $3.19 \pm 0.022$ | $2.11 \pm 0.028$ | $2.22 \pm 0.003$ |
| 40.17               | $2.63 \pm 0.035$ | $1.72 \pm 0.049$ | $1.74 \pm 0.021$ |
| 32.45               | $1.68 \pm 0.028$ | $1.56 \pm 0.042$ | $1.46 \pm 0.05$  |
| 23.91               | ---              | $2.04 \pm 0.007$ | $2.03 \pm 0.091$ |
